# Supplementary material for: NGR-peptide−drug conjugates with dual targeting properties
Source: PubMed Central journal article supplement (PMC5456102; doi:10.1371/journal.pone.0178632), 2017-06-02

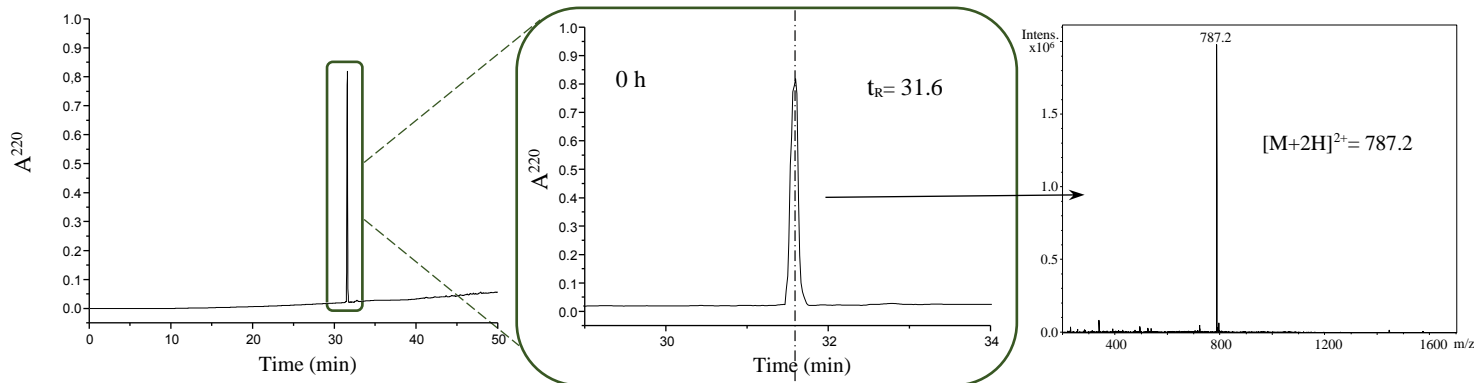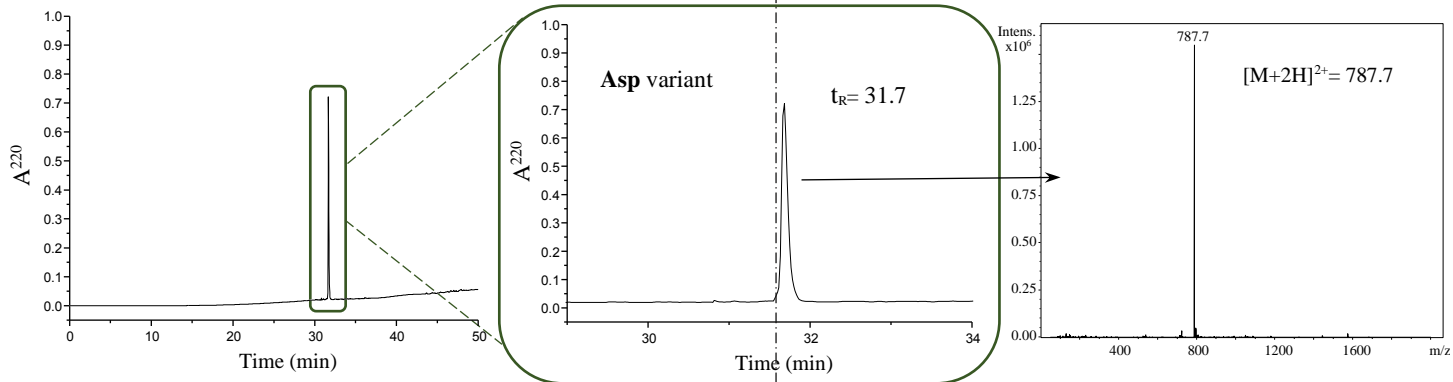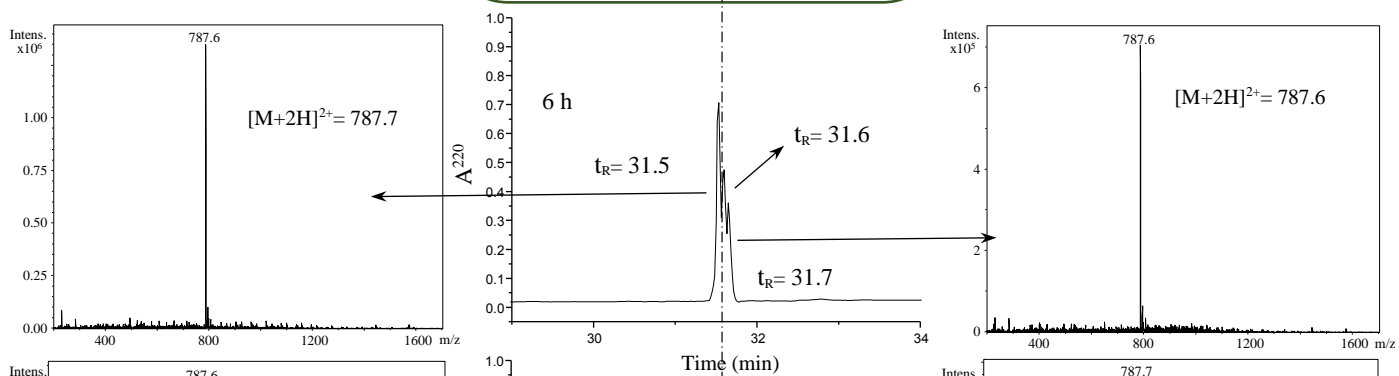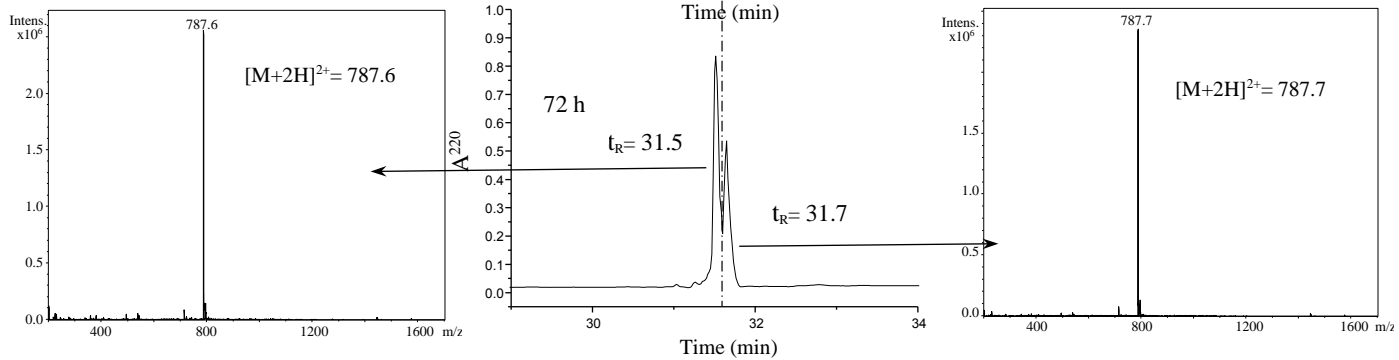

Supplement: pone.0178632.s005.pdf [file pone.0178632.s005.pdf]
