# Supplementary material for: NGR-peptide−drug conjugates with dual targeting properties
Source: PubMed Central journal article supplement (PMC5456102; doi:10.1371/journal.pone.0178632), 2017-06-02

**A**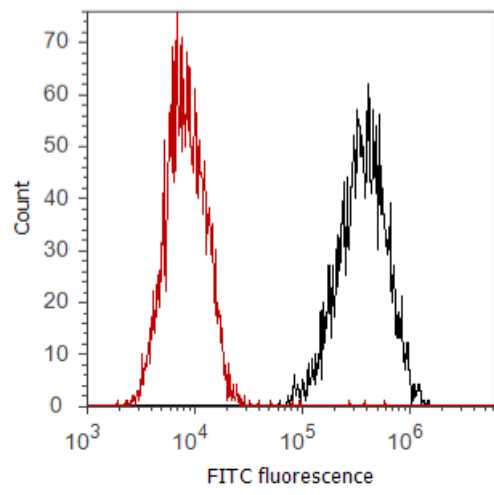**B**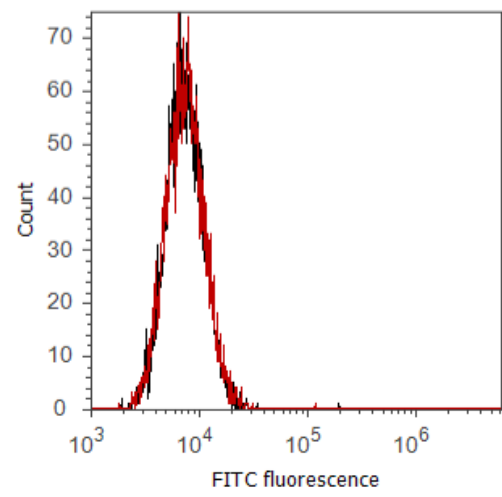

Supplement: pone.0178632.s008.pdf [file pone.0178632.s008.pdf]
